# Supplementary material
Source: Research Square preprint supplement (doi:10.21203/rs.3.rs-9019771/v1)
Supplement: Supplementary file 1 [file d228186125d31da48844051e.docx]

**Supplementary materials**

[Supplementary materials 1](#_Toc21906)

[Supplementary Figures 2](#_Toc28705)

[Figure S1. Flowchart of participant enrolment. 2](#_Toc16111)

[Figure S2. The interaction effect of α-HBDH and Ptau217 on specific cognitive domains in all participants (adjusted for sex, APOE status, age, and education). Abbreviations: α-HBDH, α-Hydroxybutyrate dehydrogenase; Ptau, phosphorylated tau, SUVRs, standardized uptake value ratios. 3](#_Toc5636)

[Supplementary Tables 4](#_Toc10615)

[Table S1. The numbers (percentages) of participants with missing values in negative participants (n=143). 4](#_Toc15223)

[Table S2. The numbers (percentages) of participants with missing values in positive participants (n=102). 5](#_Toc7457)

[Table S3. Interaction effects of αHBDH with sex, age, and Aβ status on specific cognitive domains in all participants (adjusted for APOE status, and education). 6](#_Toc31510)

[Table S4. Linear regression results for specific cognitive domains in all participants, Aβ-positive and Aβ-negative groups (adjusted for sex, APOE status, age, and education). 7](#_Toc14988)

[Table S5. Linear regression results for specific cognitive domains in all participants, Aβ-positive and Aβ-negative groups excluding missing data of AD biomarkers. (adjusted for sex, APOE status, age, and education) (N = 227) 11](#_Toc2451)

[Table S6. Linear regression results for specific cognitive domains in all participants, Aβ-positive and Aβ-negative groups with males. (adjusted for APOE status, age, and education) (N = 70) 15](#_Toc26611)

[Table S7. Linear regression results for specific cognitive domains in all participants, Aβ-positive and Aβ-negative groups with females. (adjusted for APOE status, age, and education) (N = 170) 19](#_Toc20327)

[Table S8. Coefficients of blood biomarker in the LASSO Model (λ.min). 23](#_Toc8835)

# **Supplementary Figures**


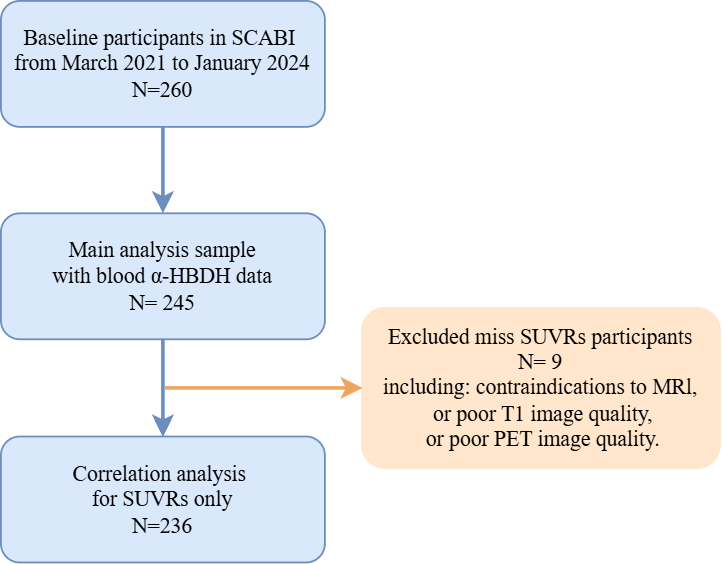


**Figure S1. Flowchart of participant enrolment.**

**
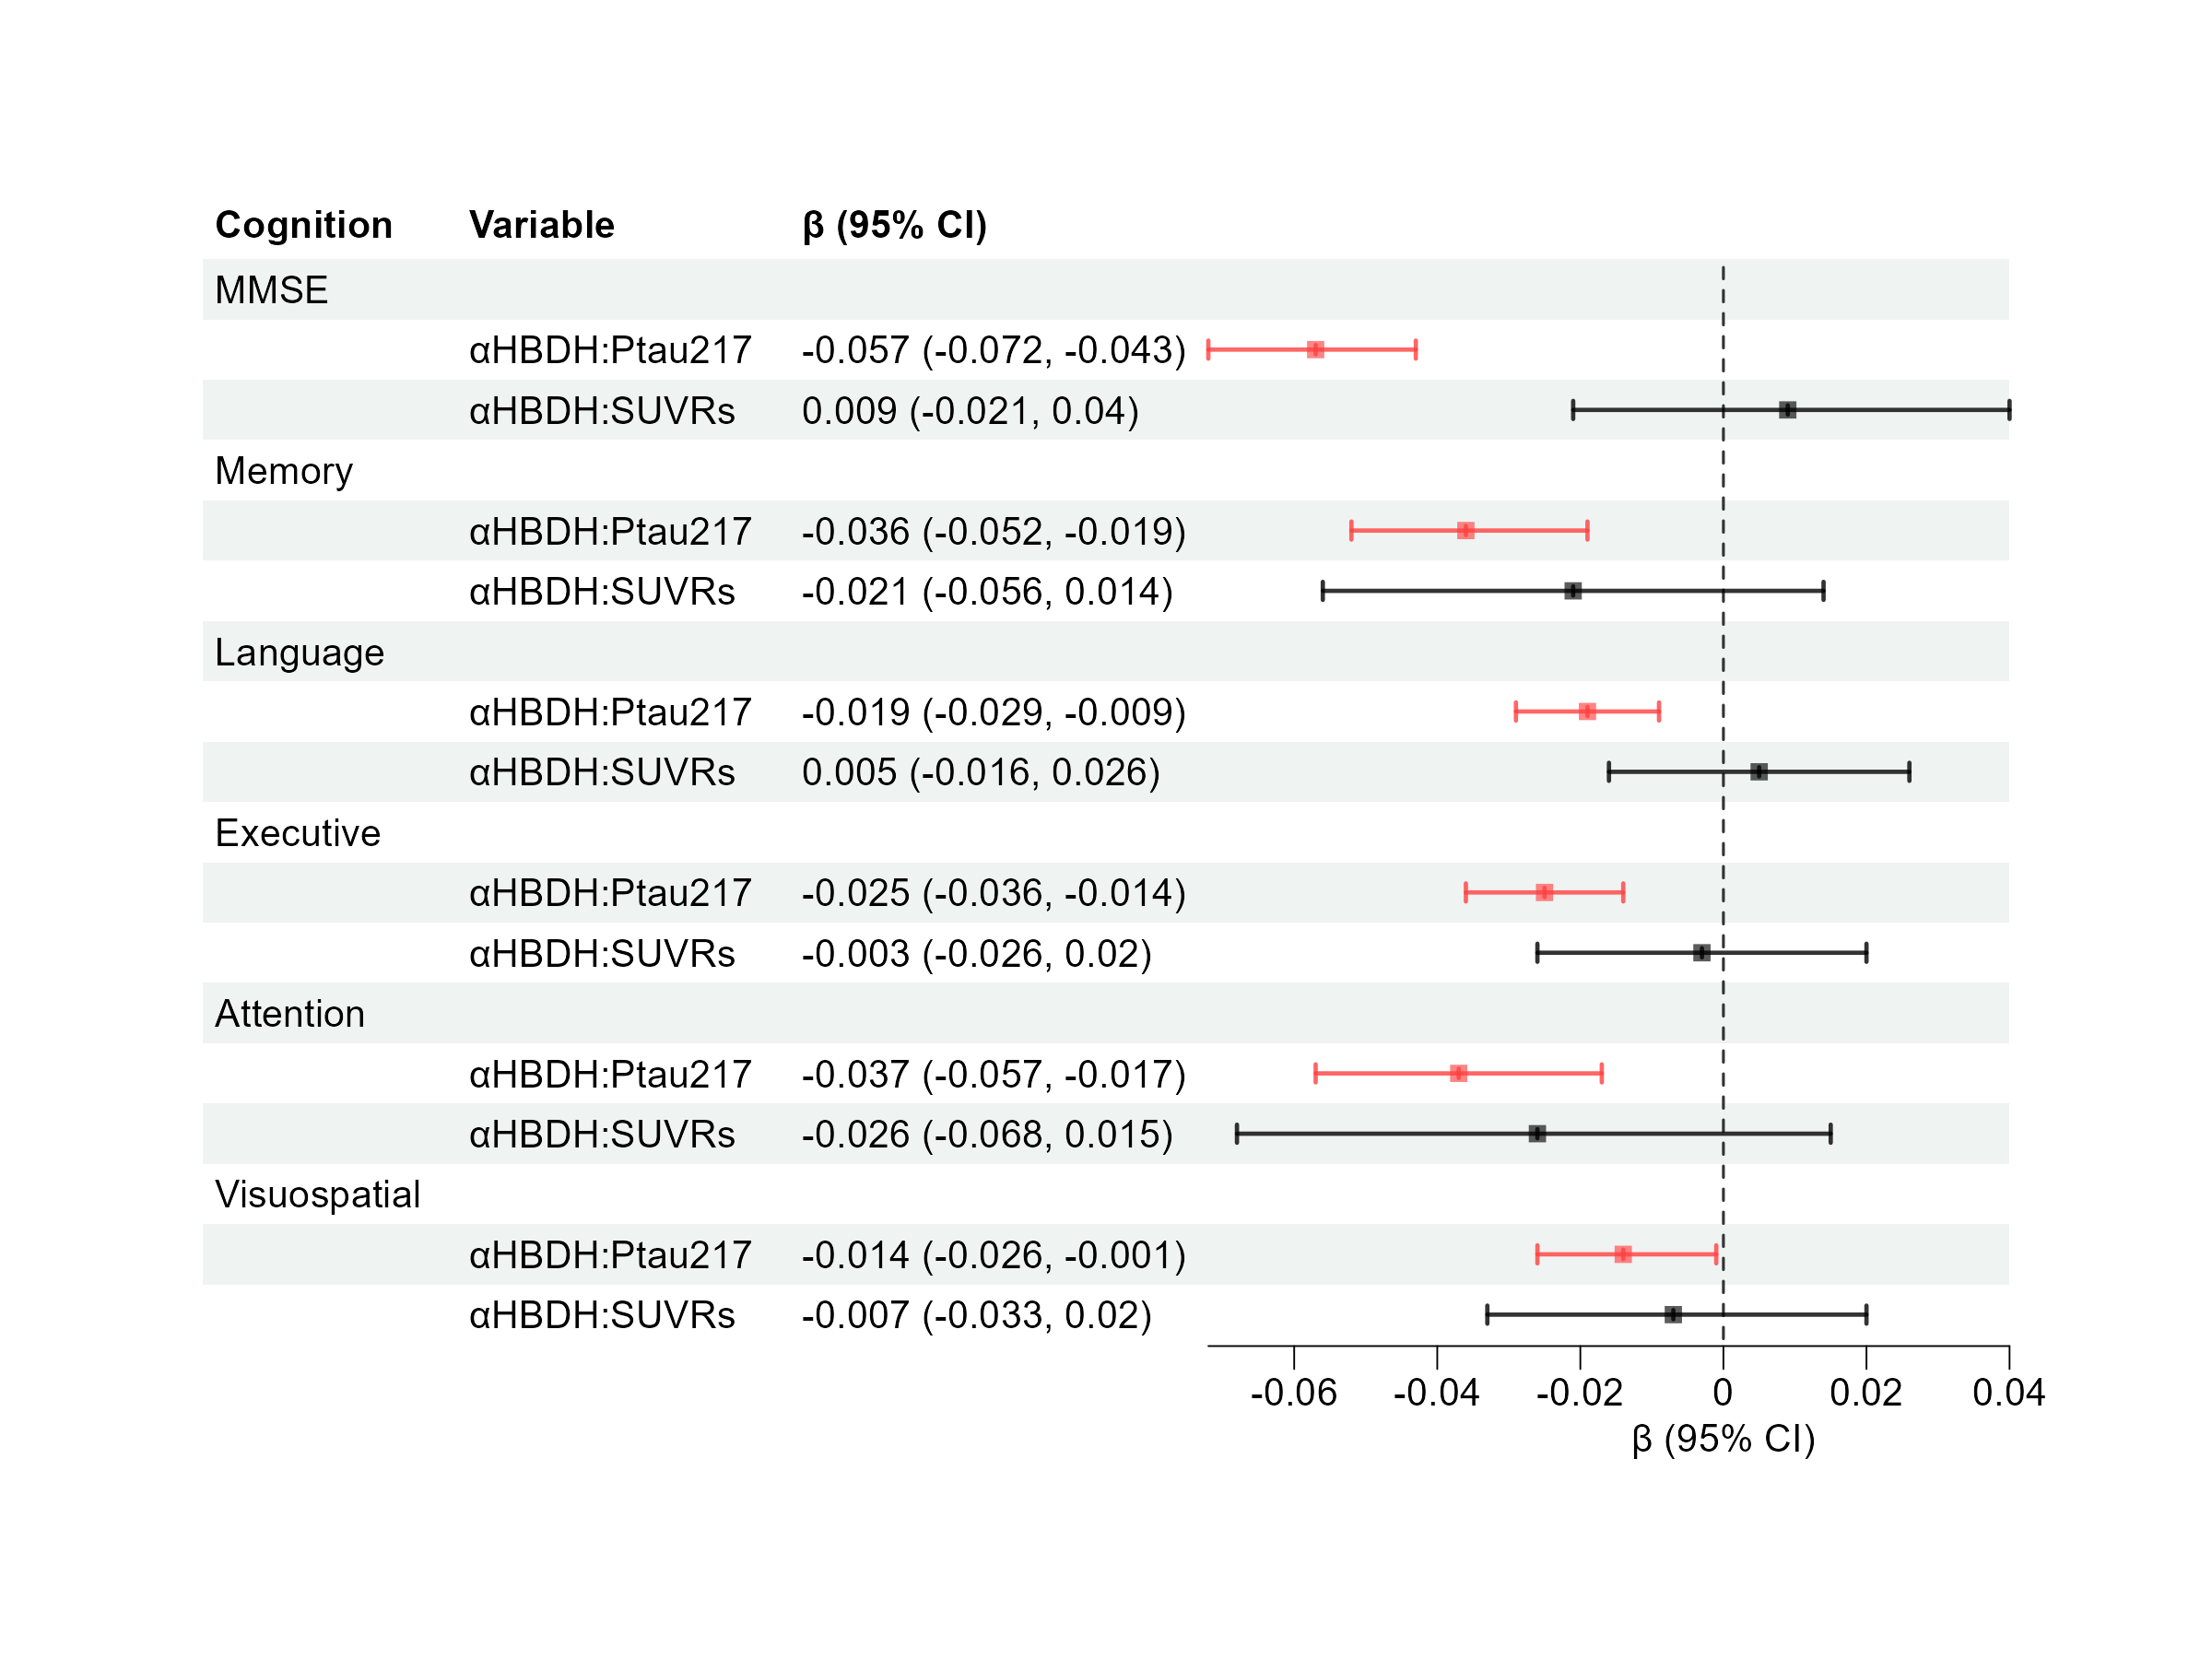
**

**Figure S2. The interaction effect of α-HBDH and Ptau217 on specific cognitive domains in all participants** (adjusted for sex, APOE status, age, and education). Abbreviations: α-HBDH, α-Hydroxybutyrate dehydrogenase; Ptau, phosphorylated tau, SUVRs, standardized uptake value ratios.

# **Supplementary Tables**

## **Table S1. The numbers (percentages) of participants with missing values in negative participants (n=143).**

| **Covariates** | **n** | **%** |
| --- | --- | --- |
| α-HBDH | 0 | 0.00 |
| Aβ1-40(pg/ mL) | 1 | 0.70 |
| Aβ1-42(pg/ mL) | 0 | 0.00 |
| pTau181(pg/ mL) | 0 | 0.00 |
| pTau217(pg/ mL) | 0 | 0.00 |
| NFL | 8 | 5.59 |
| ApoE4 | 8 | 5.59 |
| SUVRs | 7 | 4.90 |
| ADL | 1 | 0.70 |
| HIS | 0 | 0 |
| CDR | 0 | 0 |
| MMSE | 0 | 0 |

Abbreviations: Aβ, amyloid β; pTau, phosphorylated tau; tTau, total tau; SUVRs, Standardized Uptake Value Ratios.

## **Table S2. The numbers (percentages) of participants with missing values in positive participants (n=102).**

| **Covariates** | **n** | **%** |
| --- | --- | --- |
| α-HBDH | 0 | 0 |
| Aβ1-40(pg/ mL) | 1 | 0.98 |
| Aβ1-42(pg/ mL) | 0 | 0 |
| pTau181(pg/ mL) | 0 | 0 |
| pTau217(pg/ mL) | 0 | 0 |
| NFL | 10 | 9.80 |
| ApoE4 | 9 | 8.82 |
| SUVRs | 2 | 1.96 |
| ADL | 0 | 0 |
| HIS | 0 | 0 |
| CDR | 0 | 0 |
| MMSE | 0 | 0 |
| Education | 1 | 0.98 |

Abbreviations: Aβ, amyloid β; pTau, phosphorylated tau; tTau, total tau; SUVRs, Standardized Uptake Value Ratios.

## **Table S3. Interaction effects of αHBDH with sex, age, and Aβ status on specific cognitive domains in all participants** (adjusted for APOE status, and education).

| **Group** | **Model** | **Variable** | **Estimate** | **Std.Error** | **t.value** | **p.value** | **p.adjusted** |
| --- | --- | --- | --- | --- | --- | --- | --- |
| All participants | MMSE | (Intercept) | 19.12 | 2.769 | 6.906 | <0.001 | <0.001*** |
| αHBDH | -0.018 | 0.04 | -0.452 | 0.652 | 0.674 |
| αHBDH:Sex | 0.014 | 0.006 | 2.17 | 0.031 | 0.062 |
| αHBDH:Age | 0 | 0 | 0.65 | 0.516 | 0.674 |
| αHBDH:Status | -0.035 | 0.006 | -5.741 | <0.001 | <0.001*** |
| Covariates | -0.333 | 0.791 | -0.421 | 0.674 | 0.674 |
| Memory | (Intercept) | 7.831 | 2.927 | 2.675 | 0.008 | 0.016* |
| αHBDH | 0.064 | 0.043 | 1.499 | 0.135 | 0.162 |
| αHBDH:Sex | 0.021 | 0.007 | 3.147 | 0.002 | 0.006** |
| αHBDH:Age | -0.001 | 0 | -2.421 | 0.016 | 0.024* |
| αHBDH:Status | -0.032 | 0.006 | -4.918 | <0.001 | <0.001*** |
| Covariates | -1.102 | 0.837 | -1.317 | 0.189 | 0.189 |
| Language | (Intercept) | 14.4 | 1.769 | 8.142 | <0.001 | <0.001*** |
| αHBDH | -0.008 | 0.026 | -0.3 | 0.765 | 0.826 |
| αHBDH:Sex | 0.01 | 0.004 | 2.364 | 0.019 | 0.038* |
| αHBDH:Age | 0 | 0 | -0.221 | 0.826 | 0.826 |
| αHBDH:Status | -0.014 | 0.004 | -3.5 | <0.001 | 0.002** |
| Covariates | -0.448 | 0.505 | -0.885 | 0.377 | 0.565 |
| Executive | (Intercept) | 16.927 | 2.012 | 8.412 | <0.001 | <0.001*** |
| αHBDH | 0.048 | 0.029 | 1.652 | 0.100 | 0.150 |
| αHBDH:Sex | 0.009 | 0.005 | 1.987 | 0.048 | 0.096 |
| αHBDH:Age | 0 | 0 | -1.257 | 0.210 | 0.218 |
| αHBDH:Status | -0.022 | 0.004 | -4.988 | <0.001 | <0.001*** |
| Covariates | 0.711 | 0.575 | 1.235 | 0.218 | 0.218 |
| Attention | (Intercept) | 12.61 | 3.479 | 3.625 | <0.001 | 0.001** |
| αHBDH | 0.111 | 0.051 | 2.206 | 0.028 | 0.034* |
| αHBDH:Sex | 0.026 | 0.008 | 3.266 | 0.001 | 0.003** |
| αHBDH:Age | -0.002 | 0.001 | -3.104 | 0.002 | 0.003** |
| αHBDH:Status | -0.034 | 0.008 | -4.394 | <0.001 | <0.001*** |
| Covariates | -0.263 | 0.994 | -0.264 | 0.792 | 0.792 |
| Visuospatial | (Intercept) | 9.943 | 2.133 | 4.661 | <0.001 | <0.001*** |
| αHBDH | 0.016 | 0.031 | 0.519 | 0.604 | 0.647 |
| αHBDH:Sex | 0.009 | 0.005 | 1.752 | 0.081 | 0.162 |
| αHBDH:Age | 0 | 0 | -0.501 | 0.617 | 0.647 |
| αHBDH:Status | -0.021 | 0.005 | -4.538 | <0.001 | <0.001*** |
| Covariates | 0.28 | 0.61 | 0.459 | 0.647 | 0.647 |

Abbreviations: Aβ, amyloid β. Significance levels are indicated as *** (p < 0.001), ** (p < 0.01), and * (p < 0.05). p.adjusted means a false discovery rate (FDR) correction was applied.

## **Table S4. Linear regression results for specific cognitive domains in all participants, Aβ-positive and Aβ-negative groups** (adjusted for sex, APOE status, age, and education).

| **Group** | **Model** | **Variable** | **Estimate** | **Std.Error** | **t.value** | **p.value** | **p.adjusted** |
| --- | --- | --- | --- | --- | --- | --- | --- |
| All participants | MMSE | (Intercept) | 19.097 | 3.900 | 4.897 | <0.001 | <0.001*** |
| αHBDH | -0.016 | 0.026 | -0.642 | 0.521 | 0.554 |
| αHBDH:Ptau217 | -0.057 | 0.007 | -7.766 | <0.001 | <0.001*** |
| αHBDH:SUVRs | 0.009 | 0.015 | 0.592 | 0.554 | 0.554 |
| Control variables | 0.740 | 0.993 | 0.744 | 0.457 | 0.554 |
| Memory | (Intercept) | 14.955 | 4.503 | 3.321 | 0.001 | 0.003** |
| αHBDH | 0.024 | 0.030 | 0.824 | 0.411 | 0.498 |
| αHBDH:Ptau217 | -0.036 | 0.009 | -4.176 | <0.001 | <0.001*** |
| αHBDH:SUVRs | -0.021 | 0.018 | -1.197 | 0.233 | 0.388 |
| Control variables | 0.779 | 1.147 | 0.679 | 0.498 | 0.498 |
| Language | (Intercept) | 15.707 | 2.711 | 5.794 | <0.001 | <0.001*** |
| αHBDH | -0.020 | 0.018 | -1.109 | 0.269 | 0.438 |
| αHBDH:Ptau217 | -0.019 | 0.005 | -3.754 | <0.001 | <0.001*** |
| αHBDH:SUVRs | 0.005 | 0.011 | 0.463 | 0.644 | 0.644 |
| Control variables | 0.646 | 0.691 | 0.935 | 0.351 | 0.438 |
| Executive | (Intercept) | 23.879 | 2.952 | 8.090 | <0.001 | <0.001*** |
| αHBDH | -0.009 | 0.019 | -0.480 | 0.631 | 0.789 |
| αHBDH:Ptau217 | -0.025 | 0.006 | -4.523 | <0.001 | <0.001*** |
| αHBDH:SUVRs | -0.003 | 0.012 | -0.232 | 0.817 | 0.817 |
| Control variables | 1.144 | 0.752 | 1.521 | 0.130 | 0.216 |
| Attention | (Intercept) | 23.363 | 5.315 | 4.395 | <0.001 | <0.001*** |
| αHBDH | 0.034 | 0.035 | 0.976 | 0.330 | 0.330 |
| αHBDH:Ptau217 | -0.037 | 0.010 | -3.684 | <0.001 | <0.001*** |
| αHBDH:SUVRs | -0.026 | 0.021 | -1.257 | 0.210 | 0.263 |
| Control variables | 3.258 | 1.354 | 2.406 | 0.017 | 0.028* |
| Visuospatial | (Intercept) | 8.827 | 3.352 | 2.633 | 0.009 | 0.045* |
| αHBDH | 0.015 | 0.022 | 0.688 | 0.492 | 0.615 |
| αHBDH:Ptau217 | -0.014 | 0.006 | -2.204 | 0.029 | 0.067 |
| αHBDH:SUVRs | -0.007 | 0.013 | -0.497 | 0.620 | 0.620 |
| Control variables | 1.763 | 0.854 | 2.065 | 0.040 | 0.067 |
| Aβ+ positive | MMSE | (Intercept) | 8.579 | 6.961 | 1.233 | 0.221 | 0.422 |
| αHBDH | -0.022 | 0.045 | -0.488 | 0.627 | 0.783 |
| αHBDH:Ptau217 | -0.052 | 0.011 | -4.897 | <0.001 | <0.001*** |
| αHBDH:SUVRs | 0.028 | 0.025 | 1.150 | 0.253 | 0.422 |
| Control variables | -0.362 | 1.782 | -0.203 | 0.840 | 0.840 |
| Memory | (Intercept) | 0.058 | 5.990 | 0.010 | 0.992 | 0.992 |
| αHBDH | 0.064 | 0.039 | 1.640 | 0.104 | 0.261 |
| αHBDH:Ptau217 | -0.020 | 0.009 | -2.182 | 0.032 | 0.158 |
| αHBDH:SUVRs | -0.025 | 0.021 | -1.167 | 0.246 | 0.411 |
| Control variables | -0.374 | 1.534 | -0.244 | 0.808 | 0.992 |
| Language | (Intercept) | 12.432 | 4.045 | 3.073 | 0.003 | 0.014* |
| αHBDH | 0.003 | 0.026 | 0.095 | 0.924 | 0.924 |
| αHBDH:Ptau217 | -0.014 | 0.006 | -2.329 | 0.022 | 0.055 |
| αHBDH:SUVRs | 0.004 | 0.014 | 0.261 | 0.795 | 0.924 |
| Control variables | 0.202 | 1.036 | 0.195 | 0.846 | 0.924 |
| Executive | (Intercept) | 23.733 | 5.558 | 4.270 | <0.001 | <0.001*** |
| αHBDH | -0.017 | 0.036 | -0.480 | 0.633 | 0.791 |
| αHBDH:Ptau217 | -0.024 | 0.008 | -2.851 | 0.005 | 0.013* |
| αHBDH:SUVRs | 0.013 | 0.020 | 0.663 | 0.509 | 0.791 |
| Control variables | -0.371 | 1.423 | -0.261 | 0.795 | 0.795 |
| Attention | (Intercept) | 6.194 | 8.096 | 0.765 | 0.446 | 0.498 |
|  | αHBDH | 0.095 | 0.053 | 1.806 | 0.074 | 0.186 |
|  | αHBDH:Ptau217 | -0.029 | 0.012 | -2.331 | 0.022 | 0.110 |
|  | αHBDH:SUVRs | -0.020 | 0.029 | -0.681 | 0.498 | 0.498 |
|  | Control variables | 1.769 | 2.073 | 0.854 | 0.396 | 0.498 |
| Visuospatial | (Intercept) | -0.481 | 5.928 | -0.081 | 0.936 | 0.936 |
|  | αHBDH | 0.031 | 0.039 | 0.805 | 0.423 | 0.936 |
|  | αHBDH:Ptau217 | -0.005 | 0.009 | -0.553 | 0.582 | 0.936 |
|  | αHBDH:SUVRs | -0.004 | 0.021 | -0.178 | 0.859 | 0.936 |
|  | Control variables | 2.425 | 1.518 | 1.598 | 0.113 | 0.567 |
| Aβ- negative | MMSE | (Intercept) | 25.874 | 4.454 | 5.809 | <0.001 | <0.001*** |
|  | αHBDH | -0.026 | 0.033 | -0.770 | 0.443 | 0.554 |
|  | αHBDH:Ptau217 | -0.068 | 0.056 | -1.212 | 0.228 | 0.380 |
|  | αHBDH:SUVRs | -0.009 | 0.025 | -0.355 | 0.723 | 0.723 |
|  | Control variables | 2.951 | 1.136 | 2.598 | 0.010 | 0.026* |
| Memory | (Intercept) | 25.768 | 6.429 | 4.008 | <0.001 | <0.001*** |
|  | αHBDH | -0.054 | 0.048 | -1.134 | 0.259 | 0.274 |
|  | αHBDH:Ptau217 | -0.264 | 0.081 | -3.277 | 0.001 | 0.003** |
|  | αHBDH:SUVRs | 0.039 | 0.036 | 1.098 | 0.274 | 0.274 |
|  | Control variables | 3.219 | 1.640 | 1.963 | 0.052 | 0.086 |
| Language | (Intercept) | 17.464 | 3.849 | 4.537 | <0.001 | <0.001*** |
|  | αHBDH | -0.059 | 0.029 | -2.064 | 0.041 | 0.103 |
|  | αHBDH:Ptau217 | -0.064 | 0.048 | -1.323 | 0.188 | 0.226 |
|  | αHBDH:SUVRs | 0.027 | 0.021 | 1.268 | 0.207 | 0.226 |
|  | Control variables | 1.194 | 0.982 | 1.216 | 0.226 | 0.226 |
| Executive | (Intercept) | 20.465 | 3.149 | 6.499 | <0.001 | <0.001*** |
|  | αHBDH | 0.010 | 0.023 | 0.446 | 0.656 | 0.656 |
|  | αHBDH:Ptau217 | -0.052 | 0.039 | -1.328 | 0.187 | 0.233 |
|  | αHBDH:SUVRs | -0.030 | 0.017 | -1.720 | 0.088 | 0.146 |
|  | Control variables | 3.443 | 0.803 | 4.286 | <0.001 | <0.001*** |
| Attention | (Intercept) | 36.011 | 6.875 | 5.238 | <0.001 | <0.001*** |
|  | αHBDH | -0.061 | 0.051 | -1.187 | 0.237 | 0.396 |
|  | αHBDH:Ptau217 | -0.082 | 0.086 | -0.951 | 0.343 | 0.429 |
|  | αHBDH:SUVRs | -0.012 | 0.038 | -0.303 | 0.762 | 0.762 |
|  | Control variables | 5.313 | 1.754 | 3.029 | 0.003 | 0.007** |
| Visuospatial | (Intercept) | 16.362 | 3.918 | 4.176 | <0.001 | <0.001*** |
|  | αHBDH | -0.033 | 0.029 | -1.143 | 0.255 | 0.280 |
|  | αHBDH:Ptau217 | -0.075 | 0.049 | -1.523 | 0.130 | 0.280 |
|  | αHBDH:SUVRs | 0.024 | 0.022 | 1.084 | 0.280 | 0.280 |
|  | Control variables | 1.233 | 0.999 | 1.233 | 0.220 | 0.280 |

Abbreviations: Aβ, amyloid β; pTau, phosphorylated tau; tTau, total tau; SUVRs, Standardized Uptake Value Ratios. Significance levels are indicated as *** (p < 0.001), ** (p < 0.01), and * (p < 0.05). p.adjusted means a false discovery rate (FDR) correction was applied.

## **Table S5. Linear regression results for specific cognitive domains in all participants, Aβ-positive and Aβ-negative groups excluding missing data of AD biomarkers.** (adjusted for sex, APOE status, age, and education) (N = 227)

| **Group** | **Model** | **Variable** | **Estimate** | **Std.Error** | **t.value** | **p.value** | **p.adjusted** |
| --- | --- | --- | --- | --- | --- | --- | --- |
| All participants | MMSE | (Intercept) | 12.958 | 4.522 | 2.866 | 0.005 | 0.008** |
| αHBDH | 0.029 | 0.026 | 1.128 | 0.260 | 0.260 |
| αHBDH:Ptau217 | -0.009 | 0.003 | -3.029 | 0.003 | 0.007** |
| αHBDH:SUVRs | -0.047 | 0.015 | -3.138 | 0.002 | 0.007** |
| Control variables | 1.551 | 1.141 | 1.36 | 0.175 | 0.219 |
| Memory | (Intercept) | 10.869 | 4.948 | 2.197 | 0.029 | 0.073 |
| αHBDH | 0.046 | 0.028 | 1.608 | 0.109 | 0.182 |
| αHBDH:Ptau217 | 0 | 0.003 | -0.053 | 0.958 | 0.958 |
| αHBDH:SUVRs | -0.054 | 0.017 | -3.246 | 0.001 | 0.007** |
| Control variables | 1.637 | 1.248 | 1.311 | 0.191 | 0.239 |
| Language | (Intercept) | 11.741 | 2.995 | 3.921 | <0.001 | <0.001*** |
| αHBDH | 0.001 | 0.017 | 0.063 | 0.949 | 0.949 |
| αHBDH:Ptau217 | -0.002 | 0.002 | -0.895 | 0.372 | 0.465 |
| αHBDH:SUVRs | -0.014 | 0.01 | -1.4 | 0.163 | 0.407 |
| Control variables | 0.773 | 0.755 | 1.023 | 0.307 | 0.465 |
| Executive | (Intercept) | 16.022 | 2.976 | 5.383 | <0.001 | <0.001*** |
| αHBDH | 0.023 | 0.017 | 1.365 | 0.174 | 0.217 |
| αHBDH:Ptau217 | -0.002 | 0.002 | -1.202 | 0.231 | 0.231 |
| αHBDH:SUVRs | -0.029 | 0.01 | -2.891 | 0.004 | 0.007** |
| Control variables | 2.336 | 0.751 | 3.111 | 0.002 | 0.005** |
| Attention | (Intercept) | 22.749 | 5.515 | 4.125 | <0.001 | <0.001*** |
| αHBDH | 0.05 | 0.032 | 1.6 | 0.111 | 0.139 |
| αHBDH:Ptau217 | -0.001 | 0.004 | -0.177 | 0.860 | 0.860 |
| αHBDH:SUVRs | -0.056 | 0.018 | -3.026 | 0.003 | 0.007** |
| Control variables | 2.663 | 1.391 | 1.914 | 0.057 | 0.095 |
| Visuospatial | (Intercept) | 8.356 | 3.553 | 2.352 | 0.020 | 0.098 |
| αHBDH | 0.012 | 0.02 | 0.571 | 0.569 | 0.711 |
| αHBDH:Ptau217 | -0.001 | 0.002 | -0.348 | 0.728 | 0.728 |
| αHBDH:SUVRs | -0.023 | 0.012 | -1.926 | 0.055 | 0.138 |
| Control variables | 1.352 | 0.896 | 1.508 | 0.133 | 0.222 |
| Aβ+ positive | MMSE | (Intercept) | -0.824 | 8.142 | -0.101 | 0.920 | 0.945 |
| αHBDH | -0.023 | 0.053 | -0.429 | 0.669 | 0.945 |
| αHBDH:Ptau217 | -0.005 | 0.004 | -1.147 | 0.255 | 0.945 |
| αHBDH:SUVRs | 0.002 | 0.029 | 0.07 | 0.945 | 0.945 |
| Control variables | 0.774 | 2.157 | 0.359 | 0.721 | 0.945 |
| Memory | (Intercept) | -6.141 | 6.498 | -0.945 | 0.347 | 0.509 |
| αHBDH | 0.035 | 0.042 | 0.833 | 0.407 | 0.509 |
| αHBDH:Ptau217 | 0.005 | 0.003 | 1.679 | 0.097 | 0.485 |
| αHBDH:SUVRs | -0.024 | 0.023 | -1.042 | 0.300 | 0.509 |
| Control variables | 1.057 | 1.721 | 0.614 | 0.541 | 0.541 |
| Language | (Intercept) | 4.773 | 4.282 | 1.115 | 0.268 | 0.658 |
| αHBDH | -0.016 | 0.028 | -0.562 | 0.576 | 0.658 |
| αHBDH:Ptau217 | 0.001 | 0.002 | 0.444 | 0.658 | 0.658 |
| αHBDH:SUVRs | 0.01 | 0.015 | 0.671 | 0.504 | 0.658 |
| Control variables | 0.613 | 1.134 | 0.54 | 0.591 | 0.658 |
| Executive | (Intercept) | 11.19 | 5.349 | 2.092 | 0.040 | 0.198 |
| αHBDH | 0.023 | 0.035 | 0.679 | 0.499 | 0.705 |
| αHBDH:Ptau217 | -0.001 | 0.003 | -0.293 | 0.770 | 0.770 |
| αHBDH:SUVRs | -0.011 | 0.019 | -0.58 | 0.564 | 0.705 |
| Control variables | 2.038 | 1.417 | 1.439 | 0.154 | 0.385 |
| Attention | (Intercept) | 10.285 | 8.246 | 1.247 | 0.216 | 0.360 |
|  | αHBDH | 0.115 | 0.053 | 2.159 | 0.034 | 0.108 |
|  | αHBDH:Ptau217 | 0.002 | 0.004 | 0.37 | 0.713 | 0.713 |
|  | αHBDH:SUVRs | -0.06 | 0.029 | -2.055 | 0.043 | 0.108 |
|  | Control variables | 1.021 | 2.184 | 0.467 | 0.641 | 0.713 |
| Visuospatial | (Intercept) | -2.007 | 5.932 | -0.338 | 0.736 | 0.736 |
|  | αHBDH | 0.017 | 0.038 | 0.436 | 0.664 | 0.736 |
|  | αHBDH:Ptau217 | 0.002 | 0.003 | 0.517 | 0.606 | 0.736 |
|  | αHBDH:SUVRs | -0.009 | 0.021 | -0.41 | 0.683 | 0.736 |
|  | Control variables | 1.097 | 1.571 | 0.698 | 0.487 | 0.736 |
| Aβ- negative | MMSE | (Intercept) | 21.107 | 4.584 | 4.605 | <0.001 | <0.001*** |
|  | αHBDH | -0.008 | 0.032 | -0.24 | 0.811 | 0.811 |
|  | αHBDH:Ptau217 | -0.036 | 0.015 | -2.45 | 0.016 | 0.026* |
|  | αHBDH:SUVRs | -0.024 | 0.027 | -0.9 | 0.370 | 0.462 |
|  | Control variables | 3.329 | 1.106 | 3.009 | 0.003 | 0.008** |
| Memory | (Intercept) | 23.485 | 6.935 | 3.387 | <0.001 | 0.005** |
|  | αHBDH | -0.076 | 0.049 | -1.558 | 0.122 | 0.152 |
|  | αHBDH:Ptau217 | -0.042 | 0.022 | -1.913 | 0.058 | 0.139 |
|  | αHBDH:SUVRs | 0.046 | 0.04 | 1.146 | 0.254 | 0.254 |
|  | Control variables | 2.919 | 1.674 | 1.744 | 0.084 | 0.139 |
| Language | (Intercept) | 17.249 | 4.209 | 4.098 | <0.001 | <0.001*** |
|  | αHBDH | -0.054 | 0.03 | -1.82 | 0.071 | 0.178 |
|  | αHBDH:Ptau217 | 0 | 0.013 | 0.035 | 0.972 | 0.972 |
|  | αHBDH:SUVRs | 0.025 | 0.024 | 1.026 | 0.307 | 0.497 |
|  | Control variables | 0.863 | 1.016 | 0.849 | 0.397 | 0.497 |
| Executive | (Intercept) | 20.679 | 3.295 | 6.275 | <0.001 | <0.001*** |
|  | αHBDH | -0.019 | 0.023 | -0.839 | 0.403 | 0.549 |
|  | αHBDH:Ptau217 | 0.007 | 0.01 | 0.701 | 0.485 | 0.549 |
|  | αHBDH:SUVRs | -0.012 | 0.019 | -0.601 | 0.549 | 0.549 |
|  | Control variables | 3.166 | 0.795 | 3.981 | <0.001 | <0.001*** |
| Attention | (Intercept) | 34.186 | 7.361 | 4.644 | <0.001 | <0.001*** |
|  | αHBDH | -0.067 | 0.052 | -1.286 | 0.201 | 0.335 |
|  | αHBDH:Ptau217 | 0 | 0.023 | -0.009 | 0.993 | 0.993 |
|  | αHBDH:SUVRs | -0.002 | 0.043 | -0.047 | 0.963 | 0.993 |
|  | Control variables | 5.084 | 1.776 | 2.862 | 0.005 | 0.012* |
| Visuospatial | (Intercept) | 17.723 | 4.332 | 4.091 | <0.001 | <0.001*** |
|  | αHBDH | -0.06 | 0.031 | -1.97 | 0.051 | 0.128 |
|  | αHBDH:Ptau217 | -0.001 | 0.014 | -0.069 | 0.945 | 0.945 |
|  | αHBDH:SUVRs | 0.022 | 0.025 | 0.888 | 0.376 | 0.470 |
|  | Control variables | 1.7 | 1.046 | 1.626 | 0.107 | 0.178 |

Abbreviations: Aβ, amyloid β; pTau, phosphorylated tau; tTau, total tau; SUVRs, Standardized Uptake Value Ratios. Significance levels are indicated as *** (p < 0.001), ** (p < 0.01), and * (p < 0.05). p.adjusted means a false discovery rate (FDR) correction was applied.

## **Table S6. Linear regression results for specific cognitive domains in all participants, Aβ-positive and Aβ-negative groups with males.** (adjusted for APOE status, age, and education) (N = 70)

| **Group** | **Model** | **Variable** | **Estimate** | **Std.Error** | **t.value** | **p.value** | **p.adjusted** |
| --- | --- | --- | --- | --- | --- | --- | --- |
| All participants | MMSE | (Intercept) | 14.549 | 7.198 | 2.021 | 0.047 | 0.119 |
| αHBDH | -0.006 | 0.049 | -0.113 | 0.910 | 0.910 |
| αHBDH:Ptau217 | -0.084 | 0.015 | -5.705 | <0.001 | <0.001*** |
| αHBDH:SUVRs | 0.044 | 0.031 | 1.435 | 0.156 | 0.261 |
| Control variables | 0.33 | 1.299 | 0.254 | 0.800 | 0.910 |
| Memory | (Intercept) | 19.191 | 7.75 | 2.476 | 0.016 | 0.040* |
| αHBDH | 0.013 | 0.052 | 0.254 | 0.801 | 0.801 |
| αHBDH:Ptau217 | -0.045 | 0.016 | -2.86 | 0.006 | 0.029* |
| αHBDH:SUVRs | -0.012 | 0.033 | -0.36 | 0.720 | 0.801 |
| Control variables | -2.276 | 1.399 | -1.627 | 0.109 | 0.181 |
| Language | (Intercept) | 19.362 | 4.738 | 4.087 | <0.001 | <0.001*** |
| αHBDH | -0.015 | 0.032 | -0.46 | 0.647 | 0.809 |
| αHBDH:Ptau217 | -0.018 | 0.01 | -1.835 | 0.071 | 0.178 |
| αHBDH:SUVRs | 0.013 | 0.02 | 0.616 | 0.540 | 0.809 |
| Control variables | -0.204 | 0.855 | -0.238 | 0.812 | 0.812 |
| Executive | (Intercept) | 17.831 | 5.816 | 3.066 | 0.003 | 0.016* |
| αHBDH | -0.029 | 0.039 | -0.741 | 0.462 | 0.629 |
| αHBDH:Ptau217 | -0.008 | 0.012 | -0.674 | 0.503 | 0.629 |
| αHBDH:SUVRs | -0.002 | 0.025 | -0.087 | 0.931 | 0.931 |
| Control variables | 2.954 | 1.05 | 2.813 | 0.007 | 0.016* |
| Attention | (Intercept) | 24.462 | 9.401 | 2.602 | 0.012 | 0.029* |
| αHBDH | -0.034 | 0.064 | -0.53 | 0.598 | 0.598 |
| αHBDH:Ptau217 | -0.061 | 0.019 | -3.147 | 0.003 | 0.013* |
| αHBDH:SUVRs | 0.068 | 0.04 | 1.692 | 0.096 | 0.159 |
| Control variables | 0.912 | 1.697 | 0.537 | 0.593 | 0.598 |
| Visuospatial | (Intercept) | 6.301 | 6.764 | 0.932 | 0.355 | 0.592 |
| αHBDH | -0.009 | 0.046 | -0.194 | 0.847 | 0.847 |
| αHBDH:Ptau217 | -0.03 | 0.014 | -2.156 | 0.035 | 0.175 |
| αHBDH:SUVRs | 0.029 | 0.029 | 1.004 | 0.319 | 0.592 |
| Control variables | 0.298 | 1.221 | 0.244 | 0.808 | 0.847 |
| Aβ+ positive | MMSE | (Intercept) | 10.377 | 14.102 | 0.736 | 0.469 | 0.651 |
| αHBDH | 0.038 | 0.083 | 0.459 | 0.651 | 0.651 |
| αHBDH:Ptau217 | -0.079 | 0.022 | -3.513 | 0.002 | 0.009** |
| αHBDH:SUVRs | 0.035 | 0.048 | 0.727 | 0.474 | 0.651 |
| Control variables | -1.129 | 2.459 | -0.459 | 0.650 | 0.651 |
| Memory | (Intercept) | 5.558 | 9.42 | 0.59 | 0.561 | 0.561 |
| αHBDH | 0.093 | 0.056 | 1.68 | 0.106 | 0.265 |
| αHBDH:Ptau217 | -0.026 | 0.015 | -1.74 | 0.095 | 0.265 |
| αHBDH:SUVRs | -0.045 | 0.032 | -1.423 | 0.168 | 0.279 |
| Control variables | -1.043 | 1.642 | -0.635 | 0.532 | 0.561 |
| Language | (Intercept) | 22.897 | 6.16 | 3.717 | 0.001 | 0.005** |
| αHBDH | 0.026 | 0.036 | 0.716 | 0.481 | 0.642 |
| αHBDH:Ptau217 | -0.016 | 0.01 | -1.601 | 0.122 | 0.306 |
| αHBDH:SUVRs | -0.006 | 0.021 | -0.292 | 0.773 | 0.773 |
| Control variables | -0.712 | 1.074 | -0.663 | 0.514 | 0.642 |
| Executive | (Intercept) | 10.425 | 12.035 | 0.866 | 0.395 | 0.747 |
| αHBDH | 0.023 | 0.071 | 0.326 | 0.747 | 0.747 |
| αHBDH:Ptau217 | -0.01 | 0.019 | -0.525 | 0.605 | 0.747 |
| αHBDH:SUVRs | -0.028 | 0.041 | -0.678 | 0.504 | 0.747 |
| Control variables | 4.142 | 2.098 | 1.974 | 0.060 | 0.300 |
| Attention | (Intercept) | 21.476 | 14.584 | 1.473 | 0.154 | 0.385 |
|  | αHBDH | 0.096 | 0.086 | 1.112 | 0.277 | 0.462 |
|  | αHBDH:Ptau217 | -0.055 | 0.023 | -2.393 | 0.025 | 0.125 |
|  | αHBDH:SUVRs | 0.035 | 0.049 | 0.717 | 0.480 | 0.600 |
|  | Control variables | 1.302 | 2.542 | 0.512 | 0.613 | 0.613 |
| Visuospatial | (Intercept) | 5.487 | 12.361 | 0.444 | 0.661 | 0.661 |
|  | αHBDH | 0.037 | 0.073 | 0.509 | 0.615 | 0.661 |
|  | αHBDH:Ptau217 | -0.01 | 0.02 | -0.527 | 0.603 | 0.661 |
|  | αHBDH:SUVRs | 0.027 | 0.042 | 0.652 | 0.521 | 0.661 |
|  | Control variables | -1.199 | 2.155 | -0.557 | 0.583 | 0.661 |
| Aβ- negative | MMSE | (Intercept) | 22.839 | 7.929 | 2.88 | 0.007 | 0.035* |
|  | αHBDH | -0.052 | 0.076 | -0.688 | 0.496 | 0.570 |
|  | αHBDH:Ptau217 | -0.119 | 0.109 | -1.092 | 0.283 | 0.472 |
|  | αHBDH:SUVRs | 0.037 | 0.064 | 0.574 | 0.570 | 0.570 |
|  | Control variables | 2.141 | 1.428 | 1.499 | 0.144 | 0.359 |
| Memory | (Intercept) | 29.93 | 11.481 | 2.607 | 0.014 | 0.069 |
|  | αHBDH | -0.067 | 0.11 | -0.614 | 0.543 | 0.543 |
|  | αHBDH:Ptau217 | -0.355 | 0.158 | -2.248 | 0.032 | 0.079 |
|  | αHBDH:SUVRs | 0.067 | 0.093 | 0.718 | 0.478 | 0.543 |
|  | Control variables | -2.33 | 2.068 | -1.127 | 0.268 | 0.447 |
| Language | (Intercept) | 18.609 | 7.166 | 2.597 | 0.014 | 0.070 |
|  | αHBDH | -0.081 | 0.068 | -1.178 | 0.248 | 0.413 |
|  | αHBDH:Ptau217 | -0.053 | 0.099 | -0.534 | 0.597 | 0.734 |
|  | αHBDH:SUVRs | 0.074 | 0.058 | 1.28 | 0.210 | 0.413 |
|  | Control variables | 0.443 | 1.291 | 0.343 | 0.734 | 0.734 |
| Executive | (Intercept) | 24.371 | 6.012 | 4.054 | <0.001 | 0.002** |
|  | αHBDH | -0.081 | 0.057 | -1.408 | 0.169 | 0.281 |
|  | αHBDH:Ptau217 | -0.034 | 0.083 | -0.414 | 0.681 | 0.681 |
|  | αHBDH:SUVRs | 0.026 | 0.049 | 0.528 | 0.601 | 0.681 |
|  | Control variables | 2.509 | 1.083 | 2.317 | 0.027 | 0.068 |
| Attention | (Intercept) | 33.054 | 12.667 | 2.61 | 0.014 | 0.068 |
|  | αHBDH | -0.193 | 0.121 | -1.593 | 0.121 | 0.268 |
|  | αHBDH:Ptau217 | -0.095 | 0.174 | -0.545 | 0.590 | 0.610 |
|  | αHBDH:SUVRs | 0.147 | 0.102 | 1.435 | 0.161 | 0.268 |
|  | Control variables | 1.177 | 2.282 | 0.516 | 0.610 | 0.610 |
| Visuospatial | (Intercept) | 9.772 | 7.335 | 1.332 | 0.192 | 0.240 |
|  | αHBDH | -0.117 | 0.07 | -1.668 | 0.105 | 0.240 |
|  | αHBDH:Ptau217 | -0.086 | 0.101 | -0.855 | 0.399 | 0.399 |
|  | αHBDH:SUVRs | 0.102 | 0.059 | 1.717 | 0.096 | 0.240 |
|  | Control variables | 1.771 | 1.321 | 1.34 | 0.190 | 0.240 |

Abbreviations: Aβ, amyloid β; pTau, phosphorylated tau; tTau, total tau; SUVRs, Standardized Uptake Value Ratios. Significance levels are indicated as *** (p < 0.001), ** (p < 0.01), and * (p < 0.05). p.adjusted means a false discovery rate (FDR) correction was applied.

## **Table S7. Linear regression results for specific cognitive domains in all participants, Aβ-positive and Aβ-negative groups with females.** (adjusted for APOE status, age, and education) (N = 170)

| **Group** | **Model** | **Variable** | **Estimate** | **Std.Error** | **t.value** | **p.value** | **p.adjusted** |
| --- | --- | --- | --- | --- | --- | --- | --- |
| All participants | MMSE | (Intercept) | 24.242 | 4.503 | 5.384 | <0.001 | <0.001*** |
| αHBDH | -0.025 | 0.03 | -0.831 | 0.407 | 0.509 |
| αHBDH:Ptau217 | -0.05 | 0.009 | -5.808 | <0.001 | <0.001*** |
| αHBDH:SUVRs | 0.002 | 0.018 | 0.114 | 0.910 | 0.910 |
| Control variables | -1.353 | 0.856 | -1.582 | 0.116 | 0.193 |
| Memory | (Intercept) | 20.271 | 5.413 | 3.745 | <0.001 | 0.001** |
| αHBDH | 0.028 | 0.036 | 0.77 | 0.443 | 0.443 |
| αHBDH:Ptau217 | -0.033 | 0.01 | -3.2 | 0.002 | 0.004** |
| αHBDH:SUVRs | -0.024 | 0.022 | -1.126 | 0.262 | 0.327 |
| Control variables | -1.917 | 1.029 | -1.863 | 0.064 | 0.107 |
| Language | (Intercept) | 16.343 | 3.217 | 5.081 | <0.001 | <0.001*** |
| αHBDH | -0.023 | 0.022 | -1.049 | 0.296 | 0.371 |
| αHBDH:Ptau217 | -0.02 | 0.006 | -3.225 | 0.002 | 0.004** |
| αHBDH:SUVRs | 0.003 | 0.013 | 0.269 | 0.788 | 0.788 |
| Control variables | -0.64 | 0.611 | -1.046 | 0.297 | 0.371 |
| Executive | (Intercept) | 26.414 | 3.26 | 8.103 | <0.001 | <0.001*** |
| αHBDH | -0.002 | 0.022 | -0.085 | 0.933 | 0.943 |
| αHBDH:Ptau217 | -0.032 | 0.006 | -5.13 | <0.001 | <0.001*** |
| αHBDH:SUVRs | 0.001 | 0.013 | 0.072 | 0.943 | 0.943 |
| Control variables | -0.522 | 0.62 | -0.843 | 0.401 | 0.668 |
| Attention | (Intercept) | 29.097 | 6.191 | 4.7 | <0.001 | <0.001*** |
| αHBDH | 0.054 | 0.041 | 1.311 | 0.192 | 0.240 |
| αHBDH:Ptau217 | -0.031 | 0.012 | -2.675 | 0.008 | 0.021* |
| αHBDH:SUVRs | -0.054 | 0.025 | -2.17 | 0.031 | 0.052 |
| Control variables | 0.13 | 1.176 | 0.11 | 0.912 | 0.912 |
| Visuospatial | (Intercept) | 13.505 | 3.777 | 3.576 | <0.001 | 0.002** |
| αHBDH | 0.021 | 0.025 | 0.843 | 0.401 | 0.501 |
| αHBDH:Ptau217 | -0.009 | 0.007 | -1.301 | 0.195 | 0.425 |
| αHBDH:SUVRs | -0.017 | 0.015 | -1.142 | 0.255 | 0.425 |
| Control variables | 0.462 | 0.718 | 0.644 | 0.521 | 0.521 |
| Aβ+ positive | MMSE | (Intercept) | 10.732 | 8.649 | 1.241 | 0.219 | 0.342 |
| αHBDH | -0.056 | 0.057 | -0.971 | 0.335 | 0.342 |
| αHBDH:Ptau217 | -0.043 | 0.013 | -3.393 | 0.001 | 0.006** |
| αHBDH:SUVRs | 0.031 | 0.03 | 1.019 | 0.312 | 0.342 |
| Control variables | -1.398 | 1.46 | -0.958 | 0.342 | 0.342 |
| Memory | (Intercept) | 2.75 | 7.987 | 0.344 | 0.732 | 0.732 |
| αHBDH | 0.059 | 0.053 | 1.11 | 0.271 | 0.452 |
| αHBDH:Ptau217 | -0.02 | 0.012 | -1.745 | 0.086 | 0.215 |
| αHBDH:SUVRs | -0.017 | 0.028 | -0.617 | 0.540 | 0.675 |
| Control variables | -3.303 | 1.348 | -2.45 | 0.017 | 0.086 |
| Language | (Intercept) | 9.125 | 5.38 | 1.696 | 0.095 | 0.237 |
| αHBDH | -0.009 | 0.036 | -0.263 | 0.794 | 0.800 |
| αHBDH:Ptau217 | -0.014 | 0.008 | -1.749 | 0.085 | 0.237 |
| αHBDH:SUVRs | 0.01 | 0.019 | 0.525 | 0.601 | 0.800 |
| Control variables | 0.231 | 0.908 | 0.254 | 0.800 | 0.800 |
| Executive | (Intercept) | 24.433 | 6.535 | 3.739 | <0.001 | 0.002** |
| αHBDH | -0.017 | 0.043 | -0.401 | 0.690 | 0.690 |
| αHBDH:Ptau217 | -0.031 | 0.01 | -3.279 | 0.002 | 0.004** |
| αHBDH:SUVRs | 0.024 | 0.023 | 1.049 | 0.298 | 0.431 |
| Control variables | -1.05 | 1.103 | -0.952 | 0.345 | 0.431 |
| Attention | (Intercept) | 2.664 | 10.256 | 0.26 | 0.796 | 0.796 |
|  | αHBDH | 0.087 | 0.068 | 1.283 | 0.204 | 0.451 |
|  | αHBDH:Ptau217 | -0.021 | 0.015 | -1.433 | 0.157 | 0.451 |
|  | αHBDH:SUVRs | -0.033 | 0.036 | -0.921 | 0.361 | 0.451 |
|  | Control variables | 1.623 | 1.731 | 0.938 | 0.352 | 0.451 |
| Visuospatial | (Intercept) | 3.263 | 7.271 | 0.449 | 0.655 | 0.819 |
|  | αHBDH | 0.024 | 0.048 | 0.495 | 0.622 | 0.819 |
|  | αHBDH:Ptau217 | -0.002 | 0.011 | -0.15 | 0.881 | 0.881 |
|  | αHBDH:SUVRs | -0.014 | 0.025 | -0.549 | 0.585 | 0.819 |
|  | Control variables | 1.527 | 1.227 | 1.245 | 0.218 | 0.819 |
| Aβ- negative | MMSE | (Intercept) | 32.04 | 5.224 | 6.134 | <0.001 | <0.001*** |
|  | αHBDH | -0.027 | 0.039 | -0.712 | 0.478 | 0.813 |
|  | αHBDH:Ptau217 | -0.038 | 0.068 | -0.567 | 0.572 | 0.813 |
|  | αHBDH:SUVRs | -0.013 | 0.028 | -0.454 | 0.651 | 0.813 |
|  | Control variables | -0.067 | 1.096 | -0.061 | 0.951 | 0.951 |
| Memory | (Intercept) | 31.774 | 7.487 | 4.244 | <0.001 | <0.001*** |
|  | αHBDH | -0.044 | 0.055 | -0.786 | 0.434 | 0.542 |
|  | αHBDH:Ptau217 | -0.218 | 0.097 | -2.254 | 0.027 | 0.067 |
|  | αHBDH:SUVRs | 0.023 | 0.041 | 0.568 | 0.572 | 0.572 |
|  | Control variables | 1.665 | 1.571 | 1.06 | 0.292 | 0.487 |
| Language | (Intercept) | 19.76 | 4.419 | 4.472 | <0.001 | <0.001*** |
|  | αHBDH | -0.059 | 0.033 | -1.804 | 0.075 | 0.187 |
|  | αHBDH:Ptau217 | -0.065 | 0.057 | -1.137 | 0.259 | 0.351 |
|  | αHBDH:SUVRs | 0.02 | 0.024 | 0.824 | 0.412 | 0.412 |
|  | Control variables | -1.006 | 0.927 | -1.085 | 0.281 | 0.351 |
| Executive | (Intercept) | 23.593 | 3.515 | 6.712 | <0.001 | <0.001*** |
|  | αHBDH | 0.033 | 0.026 | 1.261 | 0.210 | 0.255 |
|  | αHBDH:Ptau217 | -0.052 | 0.045 | -1.145 | 0.255 | 0.255 |
|  | αHBDH:SUVRs | -0.04 | 0.019 | -2.118 | 0.037 | 0.092 |
|  | Control variables | 1.155 | 0.737 | 1.566 | 0.121 | 0.201 |
| Attention | (Intercept) | 47.334 | 7.879 | 6.008 | <0.001 | <0.001*** |
|  | αHBDH | -0.045 | 0.058 | -0.77 | 0.443 | 0.739 |
|  | αHBDH:Ptau217 | -0.042 | 0.102 | -0.409 | 0.684 | 0.829 |
|  | αHBDH:SUVRs | -0.035 | 0.043 | -0.817 | 0.416 | 0.739 |
|  | Control variables | -0.357 | 1.653 | -0.216 | 0.829 | 0.829 |
| Visuospatial | (Intercept) | 21.218 | 4.446 | 4.772 | <0.001 | <0.001*** |
|  | αHBDH | -0.023 | 0.033 | -0.711 | 0.479 | 0.637 |
|  | αHBDH:Ptau217 | -0.05 | 0.057 | -0.865 | 0.389 | 0.637 |
|  | αHBDH:SUVRs | 0.016 | 0.024 | 0.661 | 0.510 | 0.637 |
|  | Control variables | -0.412 | 0.933 | -0.441 | 0.660 | 0.660 |

Abbreviations: Aβ, amyloid β; pTau, phosphorylated tau; tTau, total tau; SUVRs, Standardized Uptake Value Ratios. Significance levels are indicated as *** (p < 0.001), ** (p < 0.01), and * (p < 0.05). p.adjusted means a false discovery rate (FDR) correction was applied.

## **Table S8. Coefficients of blood biomarkers in the LASSO Model (λ.min).**

| **Variables** | **Coefficients** | **direction** |
| --- | --- | --- |
| Ptau217 | 5.68 | Up |
| SUVRs | 0.67 | Up |
| αHBDH | 0.32 | Up |
| Ptau181 | 0.31 | Up |
| Aβ1-42 | -0.55 | Down |
| Aβ1-42/Aβ1-40 | -0.90 | Down |

Abbreviations: Aβ, amyloid β; pTau, phosphorylated tau; tTau, total tau; SUVRs, Standardized Uptake Value Ratios.
